# Supplementary material for: Association of Coded Housing Instability and Hospitalization in the US
Source: PubMed Central journal article supplement (PMC9664259; doi:10.1001/jamanetworkopen.2022.41951), 2022-11-14
Supplement: jamanetwopen-e2241951-s001.pdf [file jamanetwopen-e2241951-s001.pdf]

## Supplemental Online Content

Rollings KA, Kunnath N, Ryus CR, Janke AT, Ibrahim AM. Association of coded housing instability and hospitalization in the US. *JAMA Netw Open*. 2022;5(11):e2241951. doi:10.1001/jamanetworkopen.2022.41951

**eTable 1.** ICD-10 Codes Used to Create Primary Discharge Diagnoses Categories

**eTable 2.** NIS Sample Details

**eTable 3.** Characteristics of Hospitalized Patients Without and With Each of 5 Housing Instability Z59-Codes

**eTable 4.** Number of Hospital Admissions by Diagnosis Among Patients Without and With Housing Instability Codes Z59.0 (Homelessness) and Z59.1 (Inadequate Housing)

**eTable 5.** Number of Hospital Admissions by Diagnosis Among Patients Without and With Housing Instability Codes Z59.2 (Discord With Neighbors, Lodgers, and Landlords) and Z59.3 (Problems Related to Living in a Residential Institution)

**eTable 6.** Number of Hospital Admissions by Diagnosis Among Patients Without and With Housing Instability Code Z59.8 (Other Housing and Economic Problems)

**eTable 7.** Total Inpatient Days and Mean Length of Stay by Diagnosis Among Patients With and Without Housing Instability Codes Z59.0 (Homelessness), Z59.1 (Inadequate Housing), and Z59.2 (Discord With Neighbors, Lodgers, and Landlords)

**eTable 8.** Total Inpatient Days and Mean Length of Stay by Diagnosis Among Patients With and Without Housing Instability Codes Z59.3 (Problems Related to Living in a Residential Institution) and Z59.8 (Other Housing and Economic Problems)

**eTable 9.** Cost (Millions, USD) of Hospitalization by Diagnosis Among Patients With and Without Housing Instability Codes Z59.0 (Homelessness), Z59.1 (Inadequate Housing), and Z59.2 (Discord With Neighbors, Lodgers, and Landlords)

**eTable 10.** Cost (Millions, USD) of Hospitalization by Diagnosis Among Patients With and Without Housing Instability Codes Z59.3 (Problems Related to Living in a Residential Institution) and Z59.8 (Other Housing and Economic Problems)

**eFigure.** Most Common Reasons for Hospitalization Among Patients With and Without Coded Housing Instability

This supplemental material has been provided by the authors to give readers additional information about their work.

| <b>eTable 1. ICD-10 Codes Used to Create Primary Discharge Diagnoses Categories</b> |                                                                                       |
|-------------------------------------------------------------------------------------|---------------------------------------------------------------------------------------|
| <b>ICD-10 Codes</b>                                                                 | <b>Category</b>                                                                       |
| A00-B99                                                                             | Certain infections and parasitic diseases                                             |
| C00-D49                                                                             | Neoplasms                                                                             |
| D50-D89                                                                             | Diseases of the blood/blood-forming organs and certain disorders involving the immune |
| E00-E89                                                                             | Endocrine, nutritional and metabolic diseases                                         |
| F01-F99                                                                             | Mental, Behavioral and Neurodevelopmental disorders                                   |
| G00-G99                                                                             | Diseases of the nervous system                                                        |
| H00-H59                                                                             | Diseases of the eye and adnexa                                                        |
| H60-H95                                                                             | Diseases of the ear and mastoid process                                               |
| I00-I99                                                                             | Diseases of the circulatory system                                                    |
| J00-J99                                                                             | Diseases of the respiratory system                                                    |
| K00-K95                                                                             | Diseases of the digestive system                                                      |
| L00-L99                                                                             | Diseases of the skin and subcutaneous tissue                                          |
| M00-M99                                                                             | Diseases of the musculoskeletal system and connective tissue                          |
| N00-N99                                                                             | Diseases of the genitourinary system                                                  |
| O00-O9A                                                                             | Pregnancy, childbirth, and puerperium                                                 |
| P00-P96                                                                             | Certain conditions originating in the perinatal period                                |
| Q00-Q99                                                                             | Congenital malformations, deformations and chromosomal abnormalities                  |
| R00-R99                                                                             | Symptoms, signs, and abnormal clinical laboratory findings, not elsewhere classified  |
| S00-T88                                                                             | Injury, poisoning, and certain other consequences of external causes                  |
| V00-Y99                                                                             | External causes of morbidity                                                          |
| Z00-Z99                                                                             | Factors influencing health status and contact with health services                    |

*Data source:* International Classification of Diseases, Tenth Revision, Clinical Modification (ICD-10-CM)

| <b>eTable 2. NIS Sample Details</b>    |              |                 |             |             |
|----------------------------------------|--------------|-----------------|-------------|-------------|
| <b>Inclusion/Exclusion Criteria</b>    | <b>Total</b> | <b>NIS year</b> |             |             |
|                                        |              | <b>2017</b>     | <b>2018</b> | <b>2019</b> |
| Total NIS sample (with survey weights) | 106,744,957  | 35,798,453      | 35,527,481  | 35,419,023  |
| <i>Excluded:</i>                       |              |                 |             |             |
| <18 or >99 years of age                | 15,845,919   | 5,377,546       | 5,267,618   | 5,200,755   |
| Missing study data                     | 3,550,437    | 1,425,260       | 1,079,620   | 1,045,557   |
| Total N                                | 87,348,601   | 28,995,647      | 29,180,243  | 29,172,711  |

*Data source:* National Inpatient Sample (NIS), 2017-2019

**eTable 3. Characteristics of Hospitalized Patients Without and With Each of Five Housing Instability Z59-Codes**

| Characteristic                        | Without Coded Housing Instability admissions (%) (N=86,403,514) | With Coded Housing Instability Z59-code <sup>a</sup> |                           |                                |                           |                                |                           |                                |                           |                                 |                           |
|---------------------------------------|-----------------------------------------------------------------|------------------------------------------------------|---------------------------|--------------------------------|---------------------------|--------------------------------|---------------------------|--------------------------------|---------------------------|---------------------------------|---------------------------|
|                                       |                                                                 | Z59.0 admissions (%) (N=915,305)                     | Stand. Diff. <sup>b</sup> | Z59.1 admissions (%) (N=5,030) | Stand. Diff. <sup>b</sup> | Z59.2 admissions (%) (N=1,220) | Stand. Diff. <sup>b</sup> | Z59.3 admissions (%) (N=3,335) | Stand. Diff. <sup>b</sup> | Z59.8 admissions (%) (N=24,445) | Stand. Diff. <sup>b</sup> |
| <b>Age</b> , mean years (SD)          | 58.4 (20.2)                                                     | 45.4 (13.8)                                          | 0.647                     | 51.3 (20.3)                    | 0.355                     | 43.6 (16.3)                    | 0.736                     | 68.6 (19.6)                    | 0.504                     | 44 (15.9)                       | 0.715                     |
| <b>Sex</b>                            |                                                                 |                                                      |                           |                                |                           |                                |                           |                                |                           |                                 |                           |
| Male                                  | 36,506,229 (42.3)                                               | 653430 (71.4)                                        | 0.590                     | 2640 (52.5)                    | 0.207                     | 650 (53.3)                     | 0.223                     | 1485 (44.5)                    | 0.046                     | 12980 (53.1)                    | 0.220                     |
| Female                                | 49,897,282 (57.7)                                               | 261875 (28.6)                                        | (ref)                     | 2390 (47.5)                    | (ref)                     | 570 (46.7)                     | (ref)                     | 1850 (55.5)                    | (ref)                     | 11465 (46.9)                    | (ref)                     |
| <b>Race</b>                           |                                                                 |                                                      |                           |                                |                           |                                |                           |                                |                           |                                 |                           |
| Asian or Pacific Islander             | 2,429,708 (2.8)                                                 | 11440 (1.2)                                          | 0.095                     | 40 (0.8)                       | 0.122                     | 5 (0.4)                        | 0.145                     | 145 (4.3)                      | 0.093                     | 330 (1.3)                       | 0.088                     |
| Black                                 | 12,929,158 (15.0)                                               | 229425 (25.1)                                        | 0.282                     | 1300 (25.8)                    | 0.305                     | 365 (29.9)                     | 0.419                     | 470 (14.1)                     | 0.024                     | 5050 (20.7)                     | 0.160                     |
| Hispanic                              | 9,697,867 (11.2)                                                | 105360 (11.5)                                        | 0.009                     | 500 (9.9)                      | 0.041                     | 70 (5.7)                       | 0.174                     | 330 (9.9)                      | 0.042                     | 2290 (9.4)                      | 0.059                     |
| Native American                       | 553,120 (0.6)                                                   | 12655 (1.4)                                          | 0.093                     | 80 (1.6)                       | 0.119                     | 0 (0)                          | 0.080                     | 0 (0)                          | 0.080                     | 215 (0.9)                       | 0.030                     |
| White                                 | 58,218,489 (67.4)                                               | 525130 (57.4)                                        | 0.213                     | 2985 (59.3)                    | 0.171                     | 750 (61.5)                     | 0.126                     | 2245 (67.3)                    | 0.001                     | 15950 (65.2)                    | 0.045                     |
| Other <sup>c</sup>                    | 2,575,169 (3.0)                                                 | 31295 (3.4)                                          | 0.026                     | 125 (2.5)                      | 0.029                     | 30 (2.5)                       | 0.031                     | 145 (4.3)                      | 0.080                     | 610 (2.5)                       | 0.029                     |
| <b>Insurance Type</b>                 |                                                                 |                                                      |                           |                                |                           |                                |                           |                                |                           |                                 |                           |
| Private                               | 22,999,849 (26.6)                                               | 66480 (7.3)                                          | 0.439                     | 665 (13.2)                     | 0.303                     | 195 (16)                       | 0.241                     | 260 (7.8)                      | 0.426                     | 5130 (21)                       | 0.127                     |
| Medicare                              | 41,976,918 (48.6)                                               | 189370 (20.7)                                        | 0.559                     | 1825 (36.3)                    | 0.246                     | 460 (37.7)                     | 0.218                     | 2480 (74.4)                    | 0.516                     | 4575 (18.7)                     | 0.598                     |
| Medicaid                              | 15,541,175 (18.0)                                               | 511430 (55.9)                                        | 0.983                     | 1980 (39.4)                    | 0.557                     | 455 (37.3)                     | 0.503                     | 495 (14.8)                     | 0.082                     | 9090 (37.2)                     | 0.500                     |
| Other <sup>c</sup>                    | 2,408,729 (2.8)                                                 | 35050 (3.8)                                          | 0.063                     | 150 (3)                        | 0.012                     | 10 (0.8)                       | 0.120                     | 45 (1.3)                       | 0.087                     | 795 (3.3)                       | 0.028                     |
| Uninsured                             | 3,476,841 (4.0)                                                 | 112975 (12.3)                                        | 0.419                     | 410 (8.2)                      | 0.210                     | 100 (8.2)                      | 0.212                     | 55 (1.6)                       | 0.121                     | 4855 (19.9)                     | 0.806                     |
| <b>Elective Procedure</b>             | 19,786,680 (22.9)                                               | 66080 (7.2)                                          | 0.374                     | 860 (17.1)                     | 0.138                     | 160 (13.1)                     | 0.233                     | 310 (9.3)                      | 0.324                     | 2145 (8.8)                      | 0.336                     |
| <b>Emergency Admittance</b>           | 53,325,351 (61.7)                                               | 690830 (75.5)                                        | 0.283                     | 3245 (64.5)                    | 0.058                     | 855 (70.1)                     | 0.172                     | 2575 (77.2)                    | 0.319                     | 15390 (63)                      | 0.026                     |
| <b>Major Operating Room Procedure</b> | 9,179,722 (31.8)                                                | 26405 (7.9)                                          | 0.516                     | 190 (10.8)                     | 0.452                     | 5 (0.7)                        | 0.669                     | 90 (7.3)                       | 0.527                     | 620 (7.2)                       | 0.530                     |
| <b>Discharge Description</b>          |                                                                 |                                                      |                           |                                |                           |                                |                           |                                |                           |                                 |                           |
| Routine                               | 18,060,035 (62.7)                                               | 694380 (75.9)                                        | 0.270                     | 3000 (59.6)                    | 0.069                     | 1030 (84.4)                    | 0.467                     | 890 (26.7)                     | 0.617                     | 20765 (84.9)                    | 0.456                     |
| Transfer to Short Term Hospital       | 580,429 (2.0)                                                   | 16200 (1.8)                                          | 0.019                     | 130 (2.6)                      | 0.018                     | 20 (1.6)                       | 0.143                     | 85 (2.5)                       | 0.058                     | 325 (1.3)                       | 0.082                     |
| Other Transfer                        | 4,736,515 (16.4)                                                | 112495 (12.3)                                        | 0.116                     | 1245 (24.8)                    | 0.138                     | 110 (9)                        | 0.154                     | 2100 (63)                      | 1.152                     | 1910 (7.8)                      | 0.238                     |
| Home Health Care                      | 4,344,196 (15.1)                                                | 14500 (1.6)                                          | 0.377                     | 405 (8.1)                      | 0.247                     | 30 (2.5)                       | 0.346                     | 145 (4.3)                      | 0.319                     | 805 (3.3)                       | 0.321                     |
| Against Medical Advice                | 451,855 (1.6)                                                   | 75325 (8.2)                                          | 0.548                     | 220 (4.4)                      | 0.170                     | 30 (2.5)                       | 0.018                     | 40 (1.2)                       | 0.094                     | 595 (2.4)                       | 0.111                     |

Data source: National Inpatient Sample (NIS), 2017-2019

<sup>a</sup> = Z59.0= homelessness; Z59.1= inadequate housing; Z59.2= discord with neighbors, lodgers, landlords; Z59.3= problems related to living in residential institution; Z59.8= other.

<sup>b</sup> = "Standardized difference" displays the absolute value of the difference in proportions divided by the standard error and is an indicator of effect size (Cohen d) (0.20-0.49 indicates small; 0.50 to 0.79 medium; and ≥0.80, large effect sizes)."

<sup>c</sup> = "Other" race includes multiple races and state-reported race categories excluded from other NIS categories.

**eTable 4. Number of Hospital Admissions by Diagnosis Among Patients Without and With Housing Instability Codes Z59.0 (Homelessness) and Z59.1 (Inadequate Housing)**

| Discharge Diagnosis                                                                             | Without Coded Housing Instability admissions (%) | With Coded Housing Instability Z59-code <sup>a</sup> |                     |                           |                      |                     |                           |
|-------------------------------------------------------------------------------------------------|--------------------------------------------------|------------------------------------------------------|---------------------|---------------------------|----------------------|---------------------|---------------------------|
|                                                                                                 |                                                  | Z59.0 admissions (%)                                 | Odds Ratio (95% CI) | Stand. Diff. <sup>b</sup> | Z59.1 admissions (%) | Odds Ratio (95% CI) | Stand. Diff. <sup>b</sup> |
| Mental, behavioral & neurodevelopmental disorders                                               | 4,470,675 (5.2)                                  | 460035 (50.3)                                        | 18.52 (17.81-19.25) | 1.993                     | 2140 (42.5)          | 13.57 (10.16-18.12) | 1.687                     |
| Injury, poisoning, & certain other consequences of external causes                              | 7,559,439 (8.7)                                  | 67560 (7.4)                                          | 0.83 (0.8-0.86)     | 0.048                     | 355 (7.1)            | 0.79 (0.6-1.05)     | 0.060                     |
| Diseases of the circulatory system                                                              | 14,452,895 (16.7)                                | 62095 (6.8)                                          | 0.36 (0.35-0.37)    | 0.267                     | 390 (7.8)            | 0.42 (0.32-0.55)    | 0.240                     |
| Certain infections & parasitic diseases                                                         | 7,128,154 (8.2)                                  | 55000 (6.0)                                          | 0.71 (0.68-0.74)    | 0.082                     | 190 (3.8)            | 0.44 (0.31-0.62)    | 0.163                     |
| Diseases of the respiratory system                                                              | 6,918,933 (8.0)                                  | 49665 (5.4)                                          | 0.66 (0.64-0.68)    | 0.095                     | 355 (7.1)            | 0.87 (0.64-1.19)    | 0.035                     |
| Diseases of the skin & subcutaneous tissue                                                      | 1,605,849 (1.9)                                  | 46195 (5.0)                                          | 2.81 (2.7-2.92)     | 0.234                     | 180 (3.6)            | 1.96 (1.35-2.84)    | 0.127                     |
| Endocrine, nutritional & metabolic diseases                                                     | 3,761,624 (4.4)                                  | 37080 (4.1)                                          | 0.93 (0.9-0.96)     | 0.015                     | 205 (4.1)            | 0.93 (0.66-1.32)    | 0.014                     |
| Diseases of the digestive system                                                                | 8,581,113 (9.9)                                  | 36335 (4.0)                                          | 0.37 (0.36-0.39)    | 0.200                     | 120 (2.4)            | 0.22 (0.14-0.34)    | 0.252                     |
| Diseases of the musculoskeletal system & connective tissue                                      | 6,240,469 (7.2)                                  | 18940 (2.1)                                          | 0.27 (0.26-0.28)    | 0.200                     | 90 (1.8)             | 0.23 (0.14-0.38)    | 0.210                     |
| Diseases of the genitourinary system                                                            | 4,085,434 (4.7)                                  | 17390 (1.9)                                          | 0.39 (0.37-0.41)    | 0.134                     | 170 (3.4)            | 0.7 (0.48-1.04)     | 0.064                     |
| Symptoms, signs, & abnormal clinical laboratory findings, not elsewhere classified              | 2,401,400 (2.8)                                  | 17350 (1.9)                                          | 0.68 (0.65-0.71)    | 0.054                     | 165 (3.3)            | 1.19 (0.81-1.74)    | 0.030                     |
| Diseases of the nervous system                                                                  | 2,226,485 (2.6)                                  | 16625 (1.8)                                          | 0.7 (0.67-0.73)     | 0.048                     | 110 (2.2)            | 0.85 (0.55-1.3)     | 0.025                     |
| Pregnancy, childbirth, & puerperium                                                             | 11,157,270 (12.9)                                | 16350 (1.8)                                          | 0.12 (0.12-0.13)    | 0.333                     | 450 (8.9)            | 0.66 (0.49-0.9)     | 0.118                     |
| Neoplasms                                                                                       | 3,559,619 (4.1)                                  | 6790 (0.7)                                           | 0.17 (0.16-0.19)    | 0.171                     | 45 (0.9)             | 0.21 (0.11-0.41)    | 0.162                     |
| Diseases of the blood & blood-forming organs & certain disorders involving the immune mechanism | 1,074,870 (1.2)                                  | 4185 (0.5)                                           | 0.36 (0.34-0.39)    | 0.071                     | 30 (0.6)             | 0.48 (0.21-1.08)    | 0.058                     |
| Factors influencing health status & contact with health services                                | 908,655 (1.1)                                    | 2250 (0.2)                                           | 0.23 (0.2-0.26)     | 0.079                     | 35 (0.7)             | 0.66 (0.31-1.39)    | 0.035                     |
| Diseases of the eye & adnexa <sup>c</sup>                                                       | 65,820 (0.1)                                     | 885 (0.1)                                            | 1.27 (1.09-1.48)    | 0.007                     | 0.0 (0.0)            | NA                  | NA                        |
| Certain conditions originating in the perinatal period <sup>c</sup>                             | 905 (0.0)                                        | 0 (0.0)                                              | NA                  | NA                        | 0.0 (0.0)            | NA                  | NA                        |
| Congenital malformations, deformations & chromosomal abnormalities <sup>c</sup>                 | 109,530 (0.1)                                    | 220 (0.0)                                            | 0.19 (0.14-0.26)    | 0.029                     | 0.0 (0.0)            | NA                  | NA                        |
| Diseases of the ear & mastoid process <sup>c</sup>                                              | 93,980 (0.1)                                     | 350 (0.0)                                            | 0.35 (0.28-0.44)    | 0.021                     | 0.0 (0.0)            | NA                  | NA                        |
| External causes of morbidity <sup>c</sup>                                                       | 395 (0.0)                                        | 5 (0.0)                                              | 1.19 (0.18-7.79)    | <0.001                    | 0.0 (0.0)            | NA                  | NA                        |
| <b>Total number of hospital admissions</b>                                                      | <b>86,403,514 (98.9)</b>                         | <b>915,305 (96.8)</b>                                | NA                  | NA                        | <b>5,030 (0.5)</b>   | NA                  | NA                        |

Data source: Nationwide Inpatient Sample (NIS), 2017-2019

Abbreviations: NA, not applicable.

<sup>a</sup> = Z59.0= homelessness; Z59.1= inadequate housing; Z59.2= discord with neighbors, lodgers, landlords; Z59.3= problems related to living in residential institution; Z59.8= other.

<sup>b</sup> = "Standardized difference" displays the absolute value of the difference in proportions divided by the standard error and is an indicator of effect size (Cohen d) (0.20-0.49 indicates small; 0.50 to 0.79 medium; and ≥0.80, large effect sizes)."

<sup>c</sup> = No standardized difference is reported for a hospitalization discharge diagnosis that had none of the particular housing instability Z59-code.

**eTable 5. Number of Hospital Admissions by Diagnosis Among Patients Without and With Housing Instability Codes Z59.2 (Discord With Neighbors, Lodgers, and Landlords) and Z59.3 (Problems Related to Living in a Residential Institution)**

| Discharge Diagnosis                                                                                          | Without Coded Housing Instability admissions (%) | With Coded Housing Instability Z59-code <sup>a</sup> |                       |                           |                      |                     |                           |
|--------------------------------------------------------------------------------------------------------------|--------------------------------------------------|------------------------------------------------------|-----------------------|---------------------------|----------------------|---------------------|---------------------------|
|                                                                                                              |                                                  | Z59.2 admissions (%)                                 | Odds Ratio (95% CI)   | Stand. Diff. <sup>b</sup> | Z59.3 admissions (%) | Odds Ratio (95% CI) | Stand. Diff. <sup>b</sup> |
| Mental, behavioral & neurodevelopmental disorders                                                            | 4,470,675 (5.2)                                  | 1070 (87.7)                                          | 130.73 (86.19-198.28) | 3.726                     | 915 (27.4)           | 6.93 (4.21-11.41)   | 1.005                     |
| Injury, poisoning, & certain other consequences of external causes                                           | 7,559,439 (8.7)                                  | 35 (2.9)                                             | 0.31 (0.13-0.7)       | 0.208                     | 250 (7.5)            | 0.85 (0.62-1.16)    | 0.044                     |
| Diseases of the circulatory system                                                                           | 14,452,895 (16.7)                                | 15 (1.2)                                             | 0.06 (0.02-0.2)       | 0.415                     | 320 (9.6)            | 0.53 (0.39-0.71)    | 0.191                     |
| Certain infections & parasitic diseases                                                                      | 7,128,154 (8.2)                                  | 15 (1.2)                                             | 0.14 (0.04-0.45)      | 0.255                     | 425 (12.7)           | 1.62 (1.15-2.29)    | 0.163                     |
| Diseases of the respiratory system                                                                           | 6,918,933 (8.0)                                  | 5 (0.4)                                              | 0.05 (0.01-0.35)      | 0.280                     | 460 (13.8)           | 1.84 (1.42-2.38)    | 0.213                     |
| Diseases of the skin & subcutaneous tissue                                                                   | 1,605,849 (1.9)                                  | 0.0 (0.0)                                            | -                     | 0.138                     | 30 (0.9)             | 0.48 (0.22-1.04)    | 0.071                     |
| Endocrine, nutritional & metabolic diseases                                                                  | 3,761,624 (4.4)                                  | 15 (1.2)                                             | 0.27 (0.08-0.91)      | 0.153                     | 115 (3.4)            | 0.78 (0.51-1.21)    | 0.044                     |
| Diseases of the digestive system                                                                             | 8,581,113 (9.9)                                  | 10 (0.8)                                             | 0.07 (0.02-0.32)      | 0.305                     | 240 (7.2)            | 0.7 (0.52-0.95)     | 0.091                     |
| Diseases of the musculoskeletal system & connective tissue                                                   | 6,240,469 (7.2)                                  | 5 (0.4)                                              | 0.05 (0.01-0.39)      | 0.263                     | 30 (0.9)             | 0.12 (0.05-0.28)    | 0.244                     |
| Diseases of the genitourinary system                                                                         | 4,085,434 (4.7)                                  | 15 (1.2)                                             | 0.25 (0.08-0.83)      | 0.165                     | 210 (6.3)            | 1.35 (0.99-1.84)    | 0.074                     |
| Symptoms, signs, & abnormal clinical laboratory findings, not elsewhere classified                           | 2,401,400 (2.8)                                  | 10 (0.8)                                             | 0.29 (0.07-1.22)      | 0.119                     | 80 (2.4)             | 0.86 (0.5-1.47)     | 0.023                     |
| Diseases of the nervous system                                                                               | 2,226,485 (2.6)                                  | 20 (1.6)                                             | 0.63 (0.18-2.19)      | 0.059                     | 170 (5.1)            | 2.03 (1.33-3.1)     | 0.159                     |
| Pregnancy, childbirth, & puerperium                                                                          | 11,157,270 (12.9)                                | 5 (0.4)                                              | 0.03 (0-0.2)          | 0.373                     | 10 (0.3)             | 0.02 (0-0.08)       | 0.376                     |
| Neoplasms <sup>c</sup>                                                                                       | 3,559,619 (4.1)                                  | 0.0 (0.0)                                            | NA                    | NA                        | 20 (0.6)             | 0.14 (0.06-0.35)    | 0.177                     |
| Diseases of the blood & blood-forming organs & certain disorders involving the immune mechanism <sup>c</sup> | 1,074,870 (1.2)                                  | 0.0 (0.0)                                            | NA                    | NA                        | 30 (0.9)             | 0.72 (0.33-1.6)     | 0.031                     |
| Factors influencing health status & contact with health services <sup>c</sup>                                | 908,655 (1.1)                                    | 0.0 (0.0)                                            | NA                    | NA                        | 20 (0.6)             | 0.57 (0.19-1.7)     | 0.044                     |
| Diseases of the eye & adnexa <sup>c</sup>                                                                    | 65,820 (0.1)                                     | 0.0 (0.0)                                            | NA                    | NA                        | 5 (0.1)              | 1.97 (0.27-14.19)   | 0.027                     |
| Certain conditions originating in the perinatal period <sup>c</sup>                                          | 905 (0.0)                                        | 0.0 (0.0)                                            | NA                    | NA                        | 0.0 (0.0)            | NA                  | NA                        |
| Congenital malformations, deformations & chromosomal abnormalities <sup>c</sup>                              | 109,530 (0.1)                                    | 0.0 (0.0)                                            | NA                    | NA                        | 0.0 (0.0)            | NA                  | NA                        |
| Diseases of the ear & mastoid process <sup>c</sup>                                                           | 93,980 (0.1)                                     | 0.0 (0.0)                                            | NA                    | NA                        | 5 (0.1)              | 1.38 (0.21-9.14)    | 0.012                     |
| External causes of morbidity <sup>c</sup>                                                                    | 395 (0.0)                                        | 0.0 (0.0)                                            | NA                    | NA                        | 0.0 (0.0)            | NA                  | NA                        |
| <b>Total number of hospital admissions</b>                                                                   | <b>86,403,514 (98.9)</b>                         | <b>1,220 (0.1)</b>                                   | NA                    | NA                        | <b>3,335 (0.4)</b>   | NA                  | NA                        |

Data source: Nationwide Inpatient Sample (NIS), 2017-2019

Abbreviations: NA, not applicable.

<sup>a</sup> = Z59.0= homelessness; Z59.1= inadequate housing; Z59.2= discord with neighbors, lodgers, landlords; Z59.3= problems related to living in residential institution; Z59.8= other.

<sup>b</sup> = "Standardized difference" displays the absolute value of the difference in proportions divided by the standard error and is an indicator of effect size (Cohen d) (0.20-0.49 indicates small; 0.50 to 0.79 medium; and ≥0.80, large effect sizes)."

<sup>c</sup> = No standardized difference is reported for a hospitalization discharge diagnosis that had none of the particular housing instability Z59-code.

**eTable 6. Number of Hospital Admissions by Diagnosis Among Patients Without and With Housing Instability Code Z59.8 (Other Housing and Economic Problems)**

| Discharge Diagnosis                                                                             | Without Coded Housing Instability admissions (%) | With Coded Housing Instability Z59-code <sup>a</sup> |                     |                           |
|-------------------------------------------------------------------------------------------------|--------------------------------------------------|------------------------------------------------------|---------------------|---------------------------|
|                                                                                                 |                                                  | Z59.8 admissions (%)                                 | Odds Ratio (95% CI) | Stand. Diff. <sup>b</sup> |
| Mental, behavioral & neurodevelopmental disorders                                               | 4,470,675 (5.2)                                  | 15045 (61.5)                                         | 29.33 (23.51-36.6)  | 2.544                     |
| Injury, poisoning, & certain other consequences of external causes                              | 7,559,439 (8.7)                                  | 1160 (4.7)                                           | 0.52 (0.43-0.63)    | 0.142                     |
| Diseases of the circulatory system                                                              | 14,452,895 (16.7)                                | 1965 (8.0)                                           | 0.44 (0.36-0.52)    | 0.233                     |
| Certain infections & parasitic diseases                                                         | 7,128,154 (8.2)                                  | 445 (1.8)                                            | 0.21 (0.16-0.27)    | 0.234                     |
| Diseases of the respiratory system                                                              | 6,918,933 (8.0)                                  | 970 (4.0)                                            | 0.47 (0.39-0.58)    | 0.149                     |
| Diseases of the skin & subcutaneous tissue                                                      | 1,605,849 (1.9)                                  | 305 (1.2)                                            | 0.67 (0.5-0.89)     | 0.045                     |
| Endocrine, nutritional & metabolic diseases                                                     | 3,761,624 (4.4)                                  | 1365 (5.6)                                           | 1.3 (1.07-1.58)     | 0.060                     |
| Diseases of the digestive system                                                                | 8,581,113 (9.9)                                  | 685 (2.8)                                            | 0.26 (0.21-0.33)    | 0.238                     |
| Diseases of the musculoskeletal system & connective tissue                                      | 6,240,469 (7.2)                                  | 260 (1.1)                                            | 0.14 (0.1-0.19)     | 0.238                     |
| Diseases of the genitourinary system                                                            | 4,085,434 (4.7)                                  | 290 (1.2)                                            | 0.24 (0.18-0.32)    | 0.167                     |
| Symptoms, signs, & abnormal clinical laboratory findings, not elsewhere classified              | 2,401,400 (2.8)                                  | 320 (1.3)                                            | 0.46 (0.35-0.62)    | 0.089                     |
| Diseases of the nervous system                                                                  | 2,226,485 (2.6)                                  | 360 (1.5)                                            | 0.57 (0.43-0.74)    | 0.070                     |
| Pregnancy, childbirth, & puerperium                                                             | 11,157,270 (12.9)                                | 685 (2.8)                                            | 0.19 (0.16-0.24)    | 0.302                     |
| Neoplasms                                                                                       | 3,559,619 (4.1)                                  | 250 (1.0)                                            | 0.24 (0.18-0.33)    | 0.156                     |
| Diseases of the blood & blood-forming organs & certain disorders involving the immune mechanism | 1,074,870 (1.2)                                  | 185 (0.8)                                            | 0.61 (0.43-0.86)    | 0.044                     |
| Factors influencing health status & contact with health services                                | 908,655 (1.1)                                    | 130 (0.5)                                            | 0.5 (0.33-0.76)     | 0.051                     |
| Diseases of the eye & adnexa                                                                    | 65,820 (0.1)                                     | 5 (0.0)                                              | 0.27 (0.04-1.91)    | 0.020                     |
| Certain conditions originating in the perinatal period <sup>c</sup>                             | 905 (0.0)                                        | 0.0 (0.0)                                            | NA                  | NA                        |
| Congenital malformations, deformations & chromosomal abnormalities                              | 109,530 (0.1)                                    | 5 (0.0)                                              | 0.16 (0.02-1.15)    | 0.030                     |
| Diseases of the ear & mastoid process                                                           | 93,980 (0.1)                                     | 15 (0.1)                                             | 0.56 (0.18-1.77)    | 0.014                     |
| External causes of morbidity <sup>c</sup>                                                       | 395 (0.0)                                        | 0.0 (0.0)                                            | NA                  | NA                        |
| <b>Total number of hospital admissions</b>                                                      | <b>86,403,514 (98.9)</b>                         | <b>24,445 (2.6)</b>                                  | NA                  | NA                        |

Data source: Nationwide Inpatient Sample (NIS), 2017-2019

Abbreviations: NA, not applicable.

<sup>a</sup> = Z59.0= homelessness; Z59.1= inadequate housing; Z59.2= discord with neighbors, lodgers, landlords; Z59.3= problems related to living in residential institution; Z59.8= other.

<sup>b</sup> = "Standardized difference" displays the absolute value of the difference in proportions divided by the standard error and is an indicator of effect size (Cohen d) (0.20-0.49 indicates small; 0.50 to 0.79 medium; and  $\geq 0.80$ , large effect sizes)."

<sup>c</sup> = No standardized difference is reported for a hospitalization discharge diagnosis that had none of the particular housing instability Z59-code.

**eTable 7. Total Inpatient Days and Mean Length of Stay by Diagnosis Among Patients With and Without Housing Instability Codes Z59.0 (Homelessness), Z59.1 (Inadequate Housing), and Z59.2 (Discord With Neighbors, Lodgers, and Landlords)**

| Discharge Diagnosis                                                                                              | Without Coded Housing Instability days (%)<br>(N=86,403,514) | With Coded Housing Instability Z59-code <sup>a</sup> |                           |                             |                           |                             |                           |
|------------------------------------------------------------------------------------------------------------------|--------------------------------------------------------------|------------------------------------------------------|---------------------------|-----------------------------|---------------------------|-----------------------------|---------------------------|
|                                                                                                                  |                                                              | Z59.0 days (%)<br>(N=915,305)                        | Stand. Diff. <sup>b</sup> | Z59.1 days (%)<br>(N=5,030) | Stand. Diff. <sup>b</sup> | Z59.2 days (%)<br>(N=1,220) | Stand. Diff. <sup>a</sup> |
| Mental, behavioral and neurodevelopmental disorders                                                              | 31,111,715 (7.6)                                             | 3544616 (59.0)                                       | 1.917                     | 20440 (53.2)                | 1.722                     | 9340 (93.0)                 | 3.226                     |
| Injury, poisoning, and certain other consequences of external causes                                             | 42,977,862 (10.5)                                            | 398390 (6.6)                                         | 0.126                     | 2285 (5.9)                  | 0.148                     | 130 (1.3)                   | 0.300                     |
| Certain infections and parasitic diseases                                                                        | 48,729,037 (11.9)                                            | 376930 (6.3)                                         | 0.174                     | 2360 (6.1)                  | 0.177                     | 30 (0.3)                    | 0.358                     |
| Diseases of the circulatory system                                                                               | 71,429,857 (17.4)                                            | 338465 (5.6)                                         | 0.312                     | 2375 (6.2)                  | 0.296                     | 75 (0.7)                    | 0.440                     |
| Diseases of the respiratory system                                                                               | 34,258,750 (8.4)                                             | 225810 (3.8)                                         | 0.167                     | 1540 (4.0)                  | 0.157                     | 55 (0.5)                    | 0.282                     |
| Diseases of the skin and subcutaneous tissue                                                                     | 7,202,057 (1.8)                                              | 214790 (3.6)                                         | 0.138                     | 1235 (3.2)                  | 0.111                     | -                           | 0.134                     |
| Endocrine, nutritional and metabolic diseases                                                                    | 15,839,212 (3.9)                                             | 169425 (2.8)                                         | 0.054                     | 1055 (2.7)                  | 0.058                     | 40 (0.4)                    | 0.180                     |
| Diseases of the digestive system                                                                                 | 38,656,694 (9.4)                                             | 166540 (2.8)                                         | 0.229                     | 645 (1.7)                   | 0.265                     | 10 (0.1)                    | 0.319                     |
| Diseases of the musculoskeletal system and connective tissue                                                     | 19,203,639 (4.7)                                             | 131340 (2.2)                                         | 0.119                     | 470 (1.2)                   | 0.164                     | 50 (0.5)                    | 0.198                     |
| Diseases of the nervous system                                                                                   | 11,976,440 (2.9)                                             | 110970 (1.8)                                         | 0.064                     | 2150 (5.6)                  | 0.159                     | 225 (2.2)                   | 0.040                     |
| Diseases of the genitourinary system                                                                             | 16,894,038 (4.1)                                             | 82380 (1.4)                                          | 0.139                     | 915 (2.4)                   | 0.088                     | 35 (0.3)                    | 0.190                     |
| Pregnancy, childbirth, and puerperium                                                                            | 29,776,798 (7.3)                                             | 69975 (1.2)                                          | 0.236                     | 1485 (3.9)                  | 0.131                     | 30 (0.3)                    | 0.268                     |
| Neoplasms <sup>c</sup>                                                                                           | 21,759,871 (5.3)                                             | 65775 (1.1)                                          | 0.189                     | 415 (1.1)                   | 0.189                     | 0 (0.0)                     | NA                        |
| Symptoms, signs, and abnormal clinical laboratory findings, not elsewhere classified                             | 8,401,415 (2.0)                                              | 63455 (1.1)                                          | 0.070                     | 680 (1.8)                   | 0.020                     | 20 (0.2)                    | 0.131                     |
| Diseases of the blood and blood-forming organs and certain disorders involving the immune mechanism <sup>c</sup> | 4,727,569 (1.2)                                              | 20365 (0.3)                                          | 0.077                     | 150 (0.4)                   | 0.071                     | 0 (0.0)                     | NA                        |
| Factors influencing health status and contact with health services                                               | 6,013,903 (1.5)                                              | 17910 (0.3)                                          | 0.098                     | 225 (0.6)                   | 0.073                     | 0 (0.0)                     | 0.122                     |
| Diseases of the eye and adnexa <sup>c</sup>                                                                      | 227,895 (0.1)                                                | 6565 (0.1)                                           | 0.023                     | 0 (0.0)                     | NA                        | 0 (0.0)                     | NA                        |
| Congenital malformations, deformations and chromosomal abnormalities <sup>c</sup>                                | 549,135 (0.1)                                                | 1895 (0.0)                                           | 0.028                     | 0 (0.0)                     | NA                        | 0 (0.0)                     | NA                        |
| Diseases of the ear and mastoid process <sup>c</sup>                                                             | 260,770 (0.1)                                                | 1475 (0.0)                                           | 0.016                     | 0 (0.0)                     | NA                        | 0 (0.0)                     | NA                        |
| External causes of morbidity <sup>c</sup>                                                                        | 1,505 (0.0)                                                  | 20 (0.0)                                             | <0.001                    | 0 (0.0)                     | NA                        | 0 (0.0)                     | NA                        |
| Certain conditions originating in the perinatal period <sup>c</sup>                                              | 3,695 (0.0)                                                  | 0 (0.0)                                              | NA                        | 0 (0.0)                     | NA                        | 0 (0.0)                     | NA                        |
| <b>Total inpatient days (%)</b>                                                                                  | <b>410,001,857 (98.5)</b>                                    | <b>6,007,089 (96.9)</b>                              | NA                        | <b>38,425 (0.6)</b>         | NA                        | <b>10,040 (0.2)</b>         | NA                        |
| <b>Mean length of stay (days)</b>                                                                                | <b>4.8 (4.7-4.8)</b>                                         | <b>6.6 (6.5 to 6.7)</b>                              | 0.285                     | <b>7.6 (6.6 to 8.7)</b>     | 0.458                     | <b>8.2 (6.8 to 9.7)</b>     | 0.552                     |

Data source: Nationwide Inpatient Sample (NIS), 2017-2019

Abbreviations: NA, not applicable.

<sup>a</sup> = Z59.0= homelessness; Z59.1= inadequate housing; Z59.2= discord with neighbors, lodgers, landlords; Z59.3= problems related to living in residential institution; Z59.8= other.

<sup>b</sup> = "Standardized difference" displays the absolute value of the difference in proportions divided by the standard error and is an indicator of effect size (Cohen d) (0.20-0.49 indicates small; 0.50 to 0.79 medium; and ≥0.80, large effect sizes)."

<sup>c</sup> = No standardized difference is reported for a hospitalization discharge diagnosis that had none of the particular housing instability Z59-code.



**eTable 8. Total Inpatient Days and Mean Length of Stay by Diagnosis Among Patients With and Without Housing Instability Codes Z59.3 (Problems Related to Living in a Residential Institution) and Z59.8 (Other Housing and Economic Problems)**

| Discharge Diagnosis                                                                                 | Without Coded Housing Instability days (%) (N=86,403,514) | With Coded Housing Instability Z59-code <sup>a</sup> |                                      |                           |                                      |
|-----------------------------------------------------------------------------------------------------|-----------------------------------------------------------|------------------------------------------------------|--------------------------------------|---------------------------|--------------------------------------|
|                                                                                                     |                                                           | Z59.3 days (%) (N=3,335)                             | Standardized Difference <sup>b</sup> | Z59.8 days (%) (N=24,445) | Standardized Difference <sup>b</sup> |
| Mental, behavioral and neurodevelopmental disorders                                                 | 31,111,715 (7.6)                                          | 12005 (48.2)                                         | 1.533                                | 106120 (70.5)             | 2.375                                |
| Injury, poisoning, and certain other consequences of external causes                                | 42,977,862 (10.5)                                         | 1400 (5.6)                                           | 0.159                                | 6515 (4.3)                | 0.201                                |
| Certain infections and parasitic diseases                                                           | 48,729,037 (11.9)                                         | 2400 (9.6)                                           | 0.070                                | 2515 (1.7)                | 0.316                                |
| Diseases of the circulatory system                                                                  | 71,429,857 (17.4)                                         | 1405 (5.6)                                           | 0.311                                | 8440 (5.6)                | 0.312                                |
| Diseases of the respiratory system                                                                  | 34,258,750 (8.4)                                          | 2440 (9.8)                                           | 0.052                                | 4455 (3.0)                | 0.195                                |
| Diseases of the skin and subcutaneous tissue                                                        | 7,202,057 (1.8)                                           | 275 (1.1)                                            | 0.050                                | 1155 (0.8)                | 0.075                                |
| Endocrine, nutritional and metabolic diseases                                                       | 15,839,212 (3.9)                                          | 455 (1.8)                                            | 0.106                                | 4785 (3.2)                | 0.035                                |
| Diseases of the digestive system                                                                    | 38,656,694 (9.4)                                          | 1135 (4.6)                                           | 0.167                                | 2915 (1.9)                | 0.256                                |
| Diseases of the musculoskeletal system and connective tissue                                        | 19,203,639 (4.7)                                          | 125 (0.5)                                            | 0.198                                | 1440 (1.0)                | 0.176                                |
| Diseases of the nervous system                                                                      | 11,976,440 (2.9)                                          | 1390 (5.6)                                           | 0.158                                | 3605 (2.4)                | 0.031                                |
| Diseases of the genitourinary system                                                                | 16,894,038 (4.1)                                          | 1110 (4.5)                                           | 0.017                                | 1225 (0.8)                | 0.166                                |
| Pregnancy, childbirth, and puerperium                                                               | 29,776,798 (7.3)                                          | 25 (0.1)                                             | 0.276                                | 2615 (1.7)                | 0.213                                |
| Neoplasms                                                                                           | 21,759,871 (5.3)                                          | 165 (0.7)                                            | 0.207                                | 1440 (1.0)                | 0.194                                |
| Symptoms, signs, and abnormal clinical laboratory findings, not elsewhere classified                | 8,401,415 (2.0)                                           | 280 (1.1)                                            | 0.065                                | 1465 (1)                  | 0.076                                |
| Diseases of the blood and blood-forming organs and certain disorders involving the immune mechanism | 4,727,569 (1.2)                                           | 145 (0.6)                                            | 0.053                                | 965 (0.6)                 | 0.048                                |
| Factors influencing health status and contact with health services                                  | 6,013,903 (1.5)                                           | 85 (0.3)                                             | 0.094                                | 780 (0.5)                 | 0.079                                |
| Diseases of the eye and adnexa                                                                      | 227,895 (0.1)                                             | 60 (0.2)                                             | 0.079                                | 20 (0.0)                  | 0.018                                |
| Congenital malformations, deformations and chromosomal abnormalities <sup>c</sup>                   | 549,135 (0.1)                                             | 0 (0.0)                                              | NA                                   | 30 (0.0)                  | 0.031                                |
| Diseases of the ear and mastoid process                                                             | 260,770 (0.1)                                             | 15 (0.1)                                             | 0.001                                | 30 (0.0)                  | 0.017                                |
| External causes of morbidity <sup>c</sup>                                                           | 1,505 (0.0)                                               | 0 (0.0)                                              | NA                                   | 0 (0.0)                   | NA                                   |
| Certain conditions originating in the perinatal period <sup>c</sup>                                 | 3,695 (0.0)                                               | 0 (0.0)                                              | NA                                   | 0 (0.0)                   | NA                                   |
| <b>Total inpatient days (%)</b>                                                                     | <b>410,001,857 (98.5)</b>                                 | <b>24,915 (0.4)</b>                                  | NA                                   | <b>150,515 (2.4)</b>      | NA                                   |
| <b>Mean length of stay (days)</b>                                                                   | <b>4.8 (4.7-4.8)</b>                                      | <b>7.5 (6.2 to 8.8)</b>                              | 0.432                                | <b>6.2 (5.7 to 6.6)</b>   | 0.224                                |

Data source: Nationwide Inpatient Sample (NIS), 2017-2019

Abbreviations: NA, not applicable.

<sup>a</sup> = Z59.0= homelessness; Z59.1= inadequate housing; Z59.2= discord with neighbors, lodgers, landlords; Z59.3= problems related to living in residential institution; Z59.8= other.

<sup>b</sup> = "Standardized difference" displays the absolute value of the difference in proportions divided by the standard error and is an indicator of effect size (Cohen d) (0.20-0.49 indicates small; 0.50 to 0.79 medium; and ≥0.80, large effect sizes)."

<sup>c</sup> = No standardized difference is reported for a hospitalization discharge diagnosis that had none of the particular housing instability Z59-code.

**eTable 9. Cost (Millions, USD) of Hospitalization by Diagnosis Among Patients With and Without Housing Instability Codes Z59.0 (Homelessness), Z59.1 (Inadequate Housing), and Z59.2 (Discord With Neighbors, Lodgers, and Landlords)**

| Discharge Diagnosis                                                                                              | Without Coded Housing Instability Millions, USD (%) (N=86,403,514) | With Coded Housing Instability Z59-code <sup>a</sup> |                           |                                   |                           |                                   |                           |
|------------------------------------------------------------------------------------------------------------------|--------------------------------------------------------------------|------------------------------------------------------|---------------------------|-----------------------------------|---------------------------|-----------------------------------|---------------------------|
|                                                                                                                  |                                                                    | Z59.0 Millions, USD (%) (N=915,305)                  | Stand. Diff. <sup>b</sup> | Z59.1 Millions, USD (%) (N=5,030) | Stand. Diff. <sup>b</sup> | Z59.2 Millions, USD (%) (N=1,220) | Stand. Diff. <sup>b</sup> |
| Mental, behavioral and neurodevelopmental disorders                                                              | 31,744.8 (2.7)                                                     | 3412.0 (37.8)                                        | 2.069                     | 22.2 (39.0)                       | 2.232                     | 8.9 (87.6)                        | 5.214                     |
| Injury, poisoning, and certain other consequences of external causes                                             | 138,203.5 (11.9)                                                   | 1069.9 (11.8)                                        | <0.001                    | 4.6 (8.0)                         | 0.118                     | 0.3 (3.1)                         | 0.272                     |
| Diseases of the circulatory system                                                                               | 254,677.8 (21.8)                                                   | 848.3 (9.4)                                          | 0.302                     | 5.0 (8.8)                         | 0.316                     | 0.1 (0.6)                         | 0.514                     |
| Certain infections and parasitic diseases                                                                        | 127,040.0 (10.9)                                                   | 846.1 (9.4)                                          | 0.049                     | 3.8 (6.7)                         | 0.134                     | 0.2 (1.6)                         | 0.298                     |
| Diseases of the respiratory system                                                                               | 81,758.7 (7.0)                                                     | 504.2 (5.6)                                          | 0.056                     | 3.6 (6.3)                         | 0.028                     | 0.1 (0.5)                         | 0.253                     |
| Diseases of the skin and subcutaneous tissue <sup>c</sup>                                                        | 13,765.3 (1.2)                                                     | 428.0 (4.7)                                          | 0.324                     | 2.0 (3.6)                         | 0.223                     | 0.0 (0.0)                         | NA                        |
| Diseases of the digestive system                                                                                 | 105,462.0 (9.0)                                                    | 406.0 (4.5)                                          | 0.159                     | 1.2 (2.1)                         | 0.244                     | 0.1 (0.8)                         | 0.288                     |
| Endocrine, nutritional and metabolic diseases                                                                    | 42,263.5 (3.6)                                                     | 346.1 (3.8)                                          | 0.011                     | 2.3 (4.0)                         | 0.019                     | 0.1 (1.1)                         | 0.136                     |
| Diseases of the musculoskeletal system and connective tissue                                                     | 114,185.9 (9.8)                                                    | 287.8 (3.2)                                          | 0.223                     | 1.2 (2.2)                         | 0.256                     | 0.1 (1.2)                         | 0.291                     |
| Diseases of the nervous system                                                                                   | 28,243.7 (2.4)                                                     | 211.1 (2.3)                                          | 0.006                     | 2.5 (4.4)                         | 0.132                     | 0.2 (2.3)                         | 0.006                     |
| Neoplasms <sup>c</sup>                                                                                           | 79,056.1 (6.8)                                                     | 158.1 (1.7)                                          | 0.201                     | 1.1 (1.9)                         | 0.195                     | 0.0 (0.0)                         | NA                        |
| Diseases of the genitourinary system                                                                             | 38,380.6 (3.3)                                                     | 156.4 (1.7)                                          | 0.088                     | 1.6 (2.8)                         | 0.027                     | 0.1 (0.5)                         | 0.157                     |
| Symptoms, signs, and abnormal clinical laboratory findings, not elsewhere classified                             | 20,181.6 (1.7)                                                     | 140.8 (1.6)                                          | 0.013                     | 1.1 (2.0)                         | 0.020                     | 0.0 (0.5)                         | 0.098                     |
| Pregnancy, childbirth, and puerperium                                                                            | 60,517.8 (5.2)                                                     | 122.2 (1.4)                                          | 0.174                     | 4.0 (7.1)                         | 0.085                     | 0.0 (0.3)                         | 0.219                     |
| Diseases of the blood and blood-forming organs and certain disorders involving the immune mechanism <sup>c</sup> | 11,965.6 (1.0)                                                     | 46.5 (0.5)                                           | 0.051                     | 0.3 (0.5)                         | 0.047                     | 0.0 (0.0)                         | NA                        |
| Factors influencing health status and contact with health services <sup>c</sup>                                  | 14,092.6 (1.2)                                                     | 28.6 (0.3)                                           | 0.082                     | 0.3 (0.6)                         | 0.057                     | 0.0 (0.0)                         | NA                        |
| Congenital malformations, deformations and chromosomal abnormalities <sup>c</sup>                                | 3,345.5 (0.3)                                                      | 6.1 (0.1)                                            | 0.041                     | 0.0 (0.0)                         | NA                        | 0.0 (0.0)                         | NA                        |
| Diseases of the eye and adnexa <sup>c</sup>                                                                      | 623.0 (0.1)                                                        | 13.7 (0.2)                                           | 0.042                     | 0.0 (0.0)                         | NA                        | 0.0 (0.0)                         | NA                        |
| Certain conditions originating in the perinatal period <sup>c</sup>                                              | 10.9 (0.0)                                                         | 0.0 (0.0)                                            | NA                        | 0.0 (0.0)                         | NA                        | 0.0 (0.0)                         | NA                        |
| Diseases of the ear and mastoid process <sup>c</sup>                                                             | 697.9 (0.1)                                                        | 4.0 (0.0)                                            | 0.006                     | 0.0 (0.0)                         | NA                        | 0.0 (0.0)                         | NA                        |
| External causes of morbidity <sup>c</sup>                                                                        | 4.7 (0.0)                                                          | 0.0 (0.0)                                            | <0.001                    | 0.0 (0.0)                         | NA                        | 0.0 (0.0)                         | NA                        |
| <b>Total cost</b>                                                                                                | <b>1,166,221.5 (99.2)</b>                                          | <b>9,036.1 (97.0)</b>                                | NA                        | <b>56.9 (0.6)</b>                 | NA                        | <b>10.2 (0.1)</b>                 | NA                        |

Data source: Nationwide Inpatient Sample (NIS), 2017-2019

Abbreviations: NA, not applicable.

<sup>a</sup> = Z59.0= homelessness; Z59.1= inadequate housing; Z59.2= discord with neighbors, lodgers, landlords; Z59.3= problems related to living in residential institution; Z59.8= other.

<sup>b</sup> = "Standardized difference" displays the absolute value of the difference in proportions divided by the standard error and is an indicator of effect size (Cohen d) (0.20-0.49 indicates small; 0.50 to 0.79 medium; and ≥0.80, large effect sizes)."

<sup>c</sup> = No standardized difference is reported for a hospitalization discharge diagnosis that had none of the particular housing instability Z59-code.

**eTable 10. Cost (Millions, USD) of Hospitalization by Diagnosis Among Patients With and Without Housing Instability Codes Z59.3 (Problems Related to Living in a Residential Institution) and Z59.8 (Other Housing and Economic Problems)**

| Discharge Diagnosis                                                                                 | Without Coded Housing Instability<br>Millions, USD (%)<br>(N=86,403,514) | With Coded Housing Instability Z59-code <sup>a</sup> |                                      |                         |                                      |
|-----------------------------------------------------------------------------------------------------|--------------------------------------------------------------------------|------------------------------------------------------|--------------------------------------|-------------------------|--------------------------------------|
|                                                                                                     |                                                                          | Z59.3 (%)<br>(N=3,335)                               | Standardized Difference <sup>b</sup> | Z59.8 (%)<br>(N=24,445) | Standardized Difference <sup>b</sup> |
| Mental, behavioral and neurodevelopmental disorders                                                 | 31,744.8 (2.7)                                                           | 15.1 (35.3)                                          | 1.999                                | 100.4 (49.8)            | 2.888                                |
| Injury, poisoning, and certain other consequences of external causes                                | 138,203.5 (11.9)                                                         | 3.4 (8.0)                                            | 0.120                                | 13.9 (6.9)              | 0.154                                |
| Diseases of the circulatory system                                                                  | 254,677.8 (21.8)                                                         | 3.6 (8.5)                                            | 0.324                                | 22.2 (11)               | 0.262                                |
| Certain infections and parasitic diseases                                                           | 127,040.0 (10.9)                                                         | 5.5 (12.7)                                           | 0.060                                | 5.6 (2.8)               | 0.260                                |
| Diseases of the respiratory system                                                                  | 81,758.7 (7.0)                                                           | 5.7 (13.4)                                           | 0.249                                | 10.0 (5.0)              | 0.080                                |
| Diseases of the skin and subcutaneous tissue                                                        | 13,765.3 (1.2)                                                           | 0.4 (0.9)                                            | 0.022                                | 2.1 (1.0)               | 0.014                                |
| Diseases of the digestive system                                                                    | 105,462.0 (9.0)                                                          | 2.2 (5.2)                                            | 0.135                                | 7.4 (3.7)               | 0.187                                |
| Endocrine, nutritional and metabolic diseases                                                       | 42,263.5 (3.6)                                                           | 1.1 (2.6)                                            | 0.054                                | 10.9 (5.4)              | 0.095                                |
| Diseases of the musculoskeletal system and connective tissue                                        | 114,185.9 (9.8)                                                          | 0.2 (0.5)                                            | 0.313                                | 4.8 (2.4)               | 0.249                                |
| Diseases of the nervous system                                                                      | 28,243.7 (2.4)                                                           | 1.7 (4.0)                                            | 0.100                                | 5.6 (2.8)               | 0.023                                |
| Neoplasms                                                                                           | 79,056.1 (6.8)                                                           | 0.5 (1.1)                                            | 0.225                                | 4.1 (2.1)               | 0.188                                |
| Diseases of the genitourinary system                                                                | 38,380.6 (3.3)                                                           | 1.9 (4.5)                                            | 0.068                                | 2.5 (1.2)               | 0.115                                |
| Symptoms, signs, and abnormal clinical laboratory findings, not elsewhere classified                | 20,181.6 (1.7)                                                           | 0.7 (1.5)                                            | 0.015                                | 3.0 (1.5)               | 0.020                                |
| Pregnancy, childbirth, and puerperium                                                               | 60,517.8 (5.2)                                                           | 0.0 (0.1)                                            | 0.229                                | 4.9 (2.4)               | 0.125                                |
| Diseases of the blood and blood-forming organs and certain disorders involving the immune mechanism | 11,965.6 (1.0)                                                           | 0.4 (1.0)                                            | 0.007                                | 2.5 (1.2)               | 0.019                                |
| Factors influencing health status and contact with health services                                  | 14,092.6 (1.2)                                                           | 0.2 (0.5)                                            | 0.069                                | 1.7 (0.9)               | 0.033                                |
| Congenital malformations, deformations and chromosomal abnormalities <sup>c</sup>                   | 3,345.5 (0.3)                                                            | 0 (0.0)                                              | NA                                   | 0.1 (0.0)               | 0.049                                |
| Diseases of the eye and adnexa <sup>c</sup>                                                         | 623.0 (0.1)                                                              | 0.1 (0.3)                                            | 0.090                                | 0.1 (0.0)               | 0.009                                |
| Certain conditions originating in the perinatal period <sup>c</sup>                                 | 10.9 (0.0)                                                               | 0 (0.0)                                              | NA                                   | 0 (0.0)                 | NA                                   |
| Diseases of the ear and mastoid process <sup>c</sup>                                                | 697.9 (0.1)                                                              | 0.0 (0.1)                                            | 0.023                                | 0.1 (0.0)               | 0.013                                |
| External causes of morbidity <sup>c</sup>                                                           | 4.7 (0.0)                                                                | 0 (0.0)                                              | NA                                   | 0 (0.0)                 | NA                                   |
| <b>Total cost</b>                                                                                   | <b>1,166,221.5 (99.2)</b>                                                | <b>42.8 (0.5)</b>                                    | NA                                   | <b>201.8 (2.2)</b>      | NA                                   |

Data source: Nationwide Inpatient Sample (NIS), 2017-2019

Abbreviations: NA, not applicable.

<sup>a</sup> = Z59.0= homelessness; Z59.1= inadequate housing; Z59.2= discord with neighbors, lodgers, landlords; Z59.3= problems related to living in residential institution; Z59.8= other.

<sup>b</sup> = "Standardized difference" displays the absolute value of the difference in proportions divided by the standard error and is an indicator of effect size (Cohen d) (0.20-0.49 indicates small; 0.50 to 0.79 medium; and  $\geq 0.80$ , large effect sizes)."

<sup>c</sup> = No standardized difference is reported for a hospitalization discharge diagnosis that had none of the particular housing instability Z59-code.

**eFigure. Most Common Reasons for Hospitalization Among Patients With and Without Coded Housing Instability**

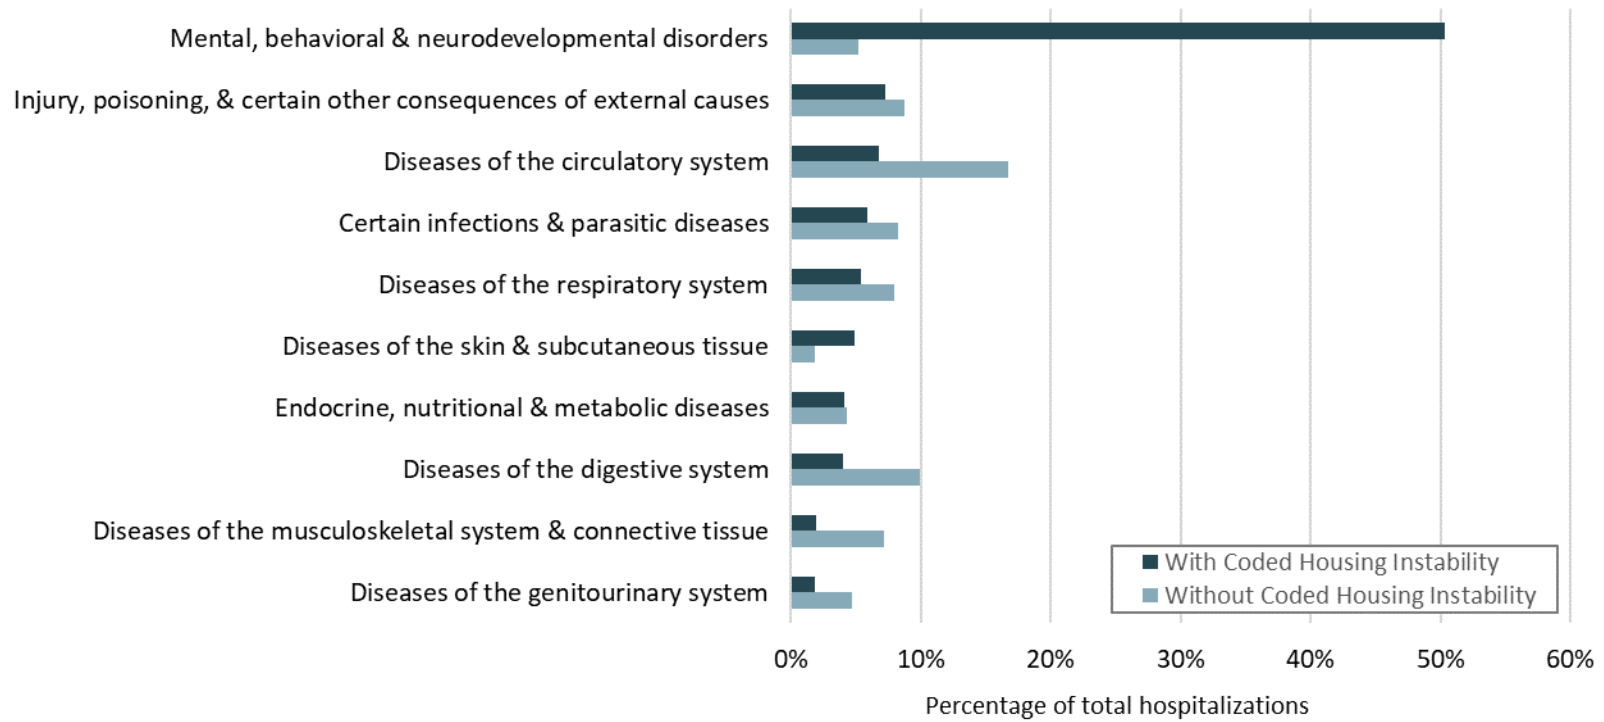

Data source: Nationwide Inpatient Sample (NIS), 2017-2019

*The 10 most common primary diagnoses were identified for patients with and without coded housing instability using the International Classification of Diseases, 10th Revision, Clinical Modification (ICD-10-CM) codes for hospitalizations.*
